# Supplementary material for: Predicting Potential Habitats of the Endangered Suweon Treefrog (Dryophytes suweonensis) under Climate Change Scenarios Using an Ensemble Ecological Niche Model
Source: Research Square preprint supplement (doi:10.21203/rs.3.rs-8119070/v1), 2025-12-12
Supplement: Supplementary file 1 [file 983cab51671a70c26fc636b1.docx]

*Scientific Reports*

**Predicting Potential Habitats of the Endangered Suweon Treefrog (*Dryophytes suweonensis*) under Climate Change Scenarios Using an Ensemble Ecological Niche Model**

Nakyung Yoo1,2,†, Dae-Seong Lee2,†, Jeongwoo Yoo1, Kwan-Ik Kwon1, Chang-Deuk Park1, Ju-Duk Yoon1,*, Young-Seuk Park2,*

1Restoration Research Team (Fishes/Amphibians & Reptile), Research Center for Endangered Species, National Institute of Ecology, Yeongyang 36531, Republic of Korea

2Department of Biology, Kyung Hee University, Seoul 02447, Republic of Korea

† These authors contributed equally to this work.

***** Correspondence:

E-mail:[grandblue@nie.re.kr](mailto:grandblue@nie.re.kr) (J.-D.Y.), [parkys@khu.ac.kr](mailto:parkys@khu.ac.kr) (Y.-S.P.)

Tel.: +82-54-680-736

Fax: +82-54-680-7329


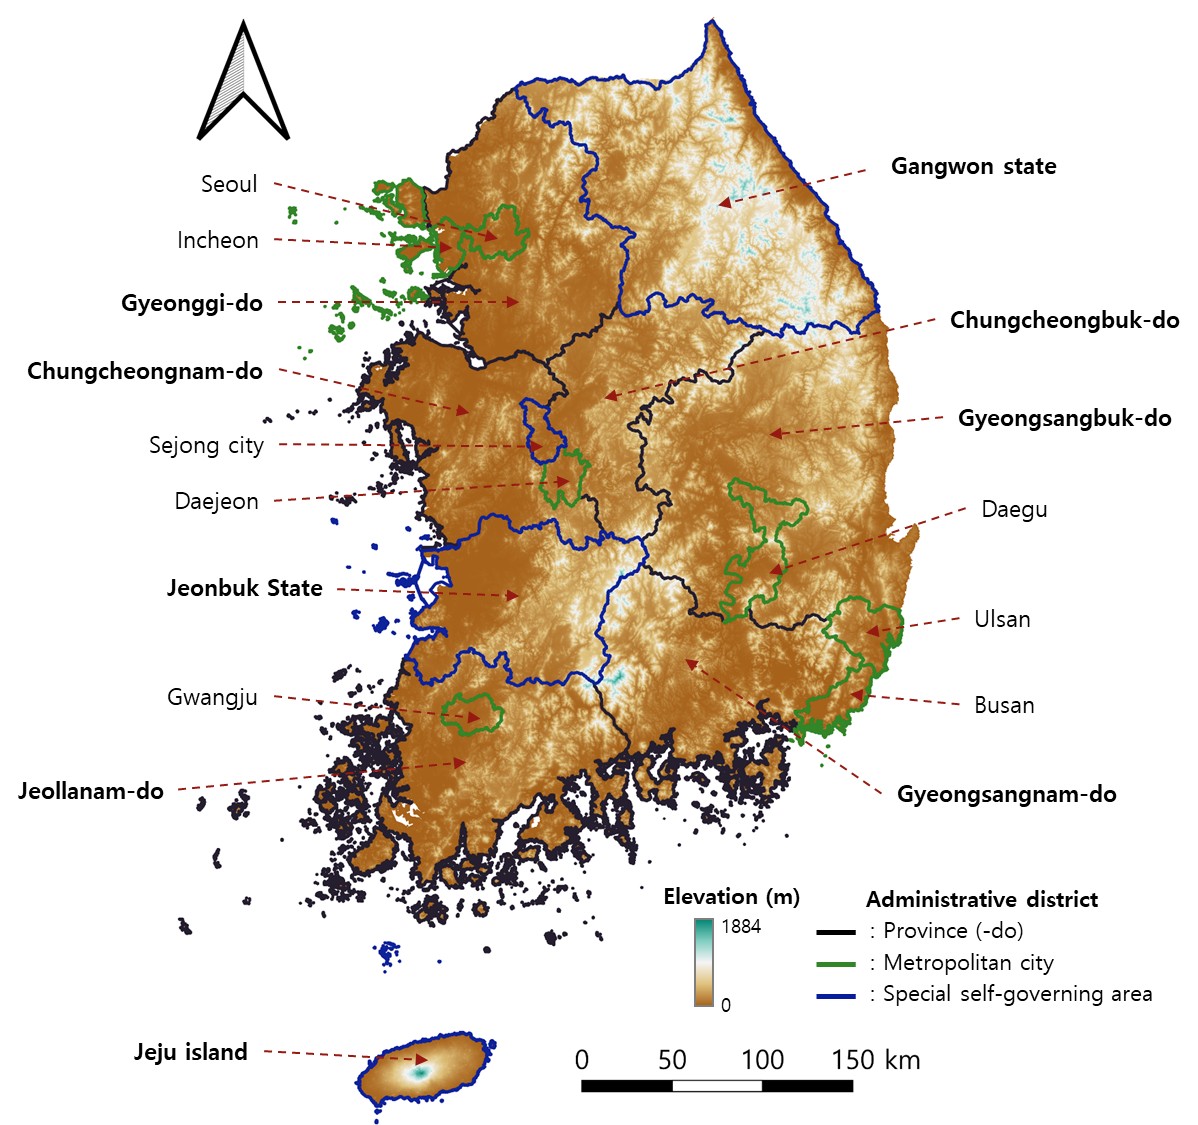


**Supplementary Figure 1** The map of South Korea, showing the administrative districts at the si, gun, and gu levels, which correspond to cities, counties, and districts

| **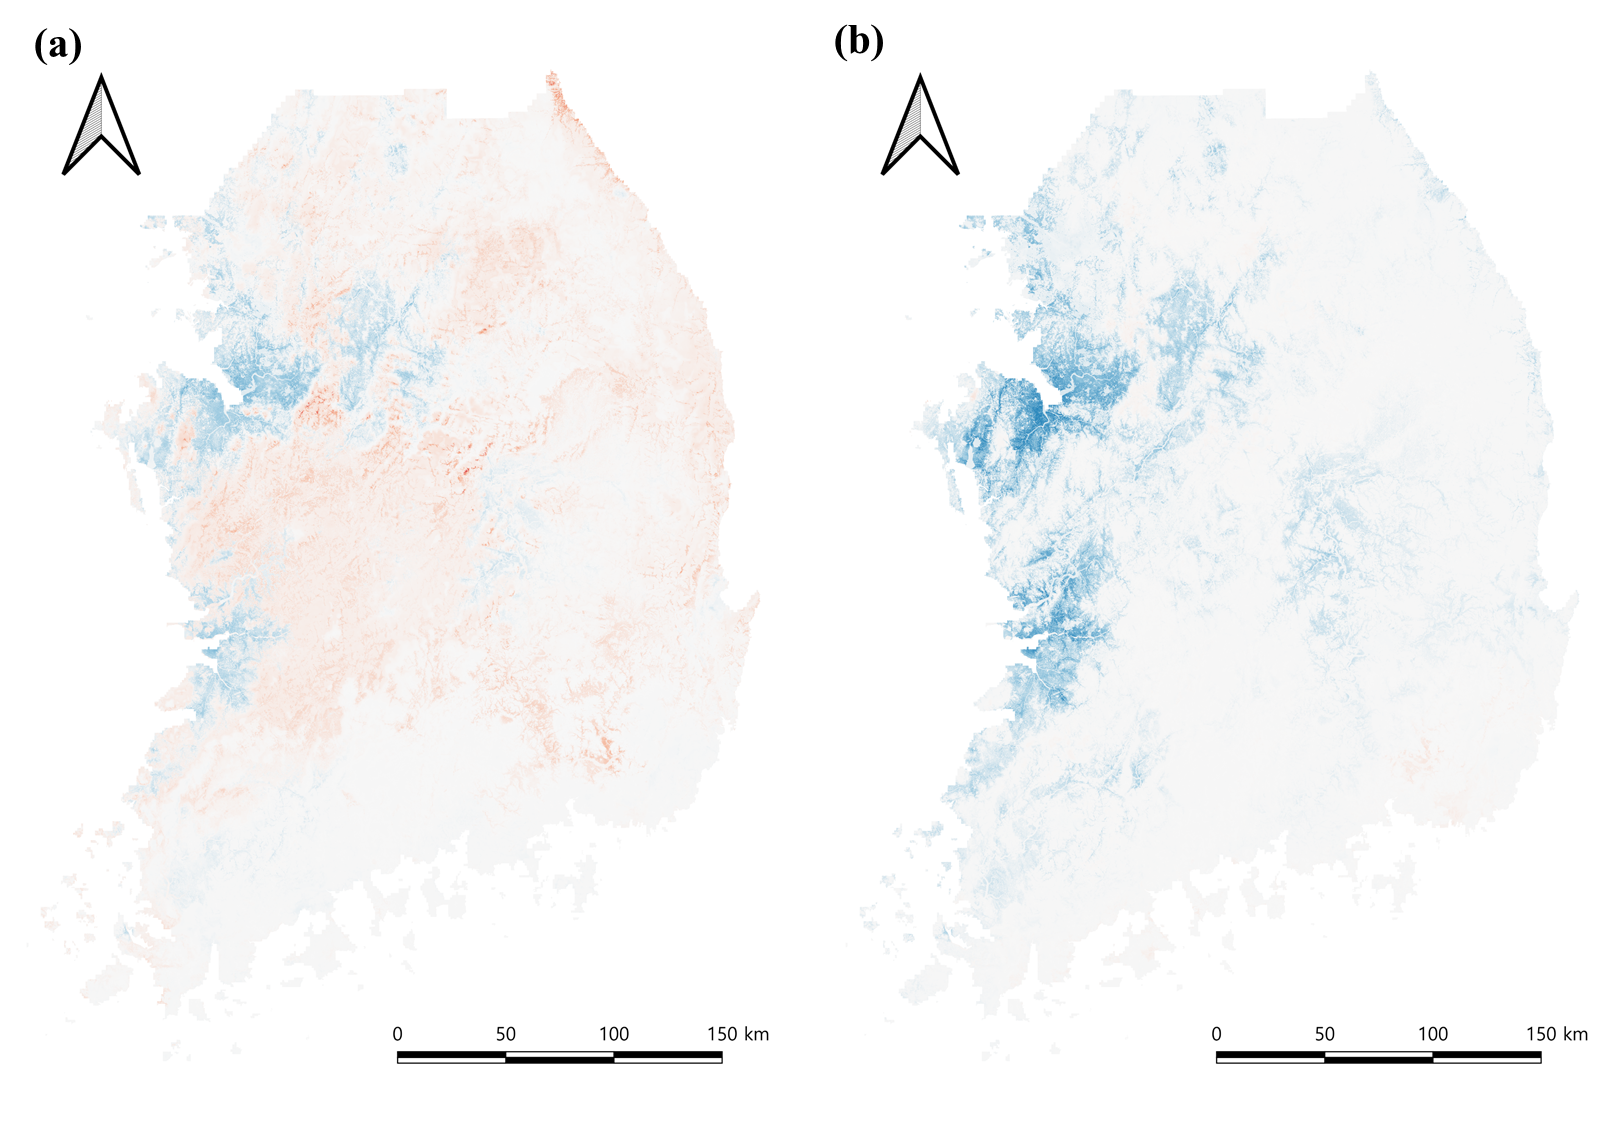** |
| --- |
| 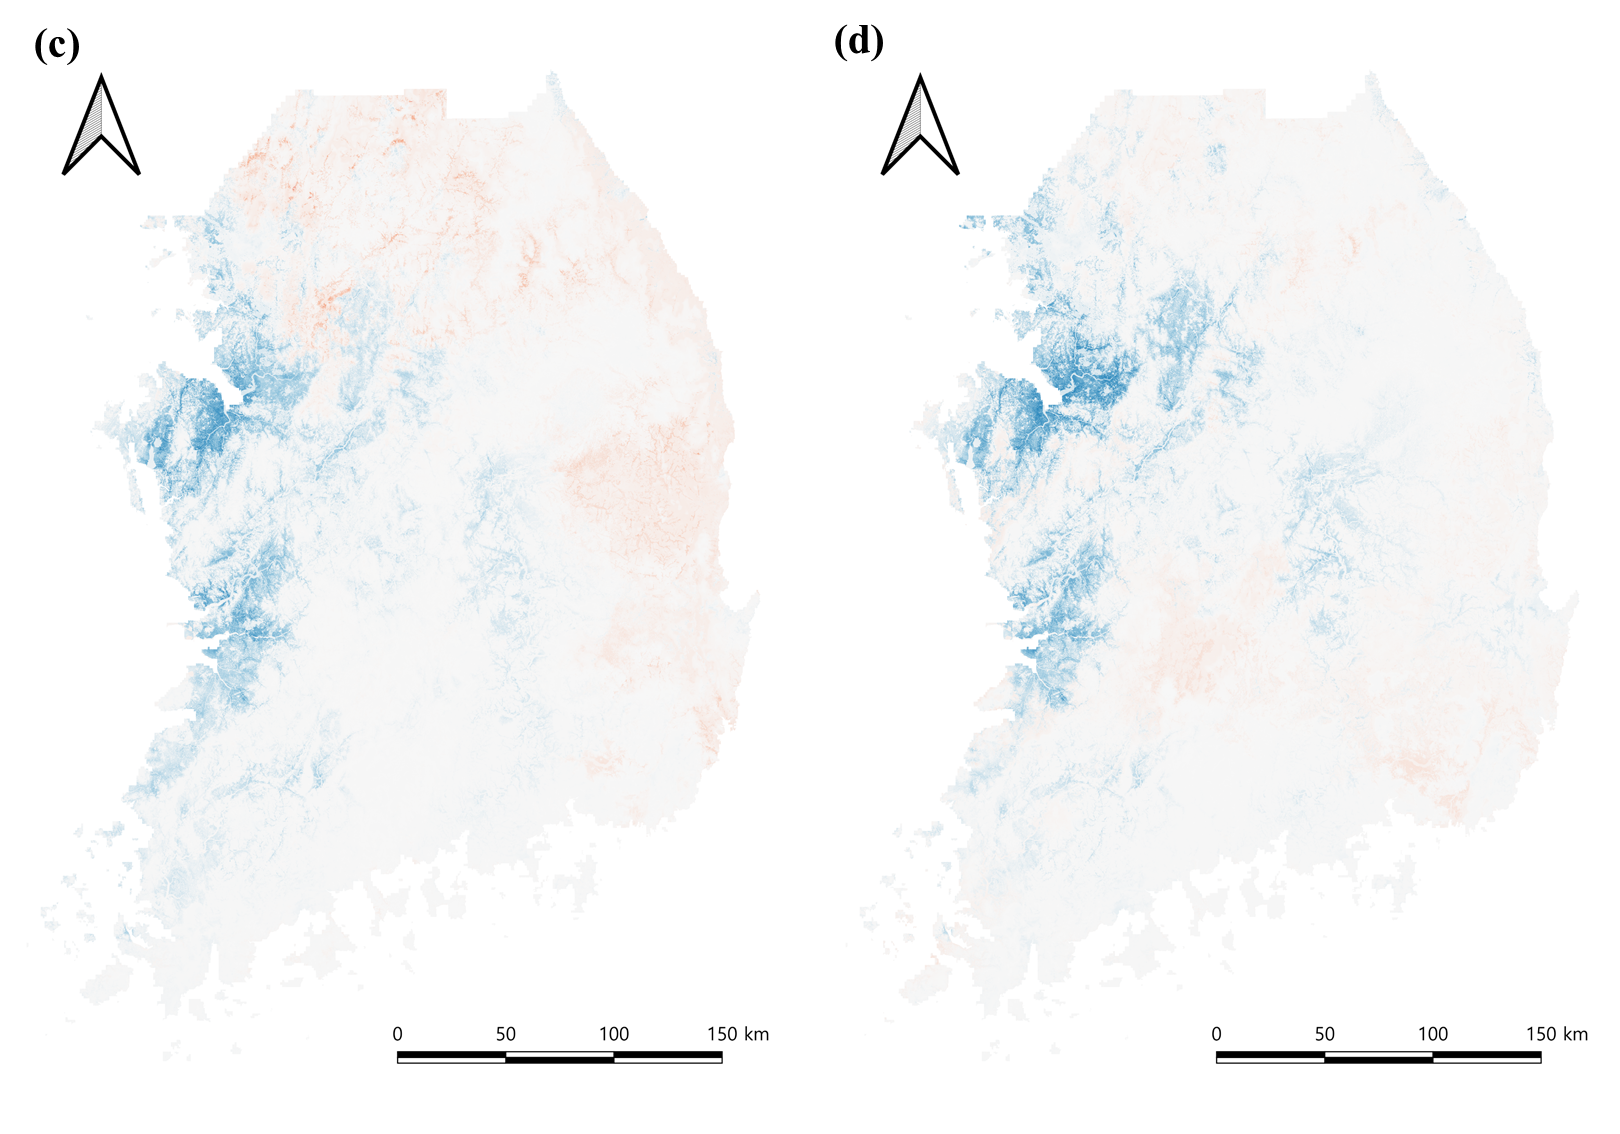 |
| 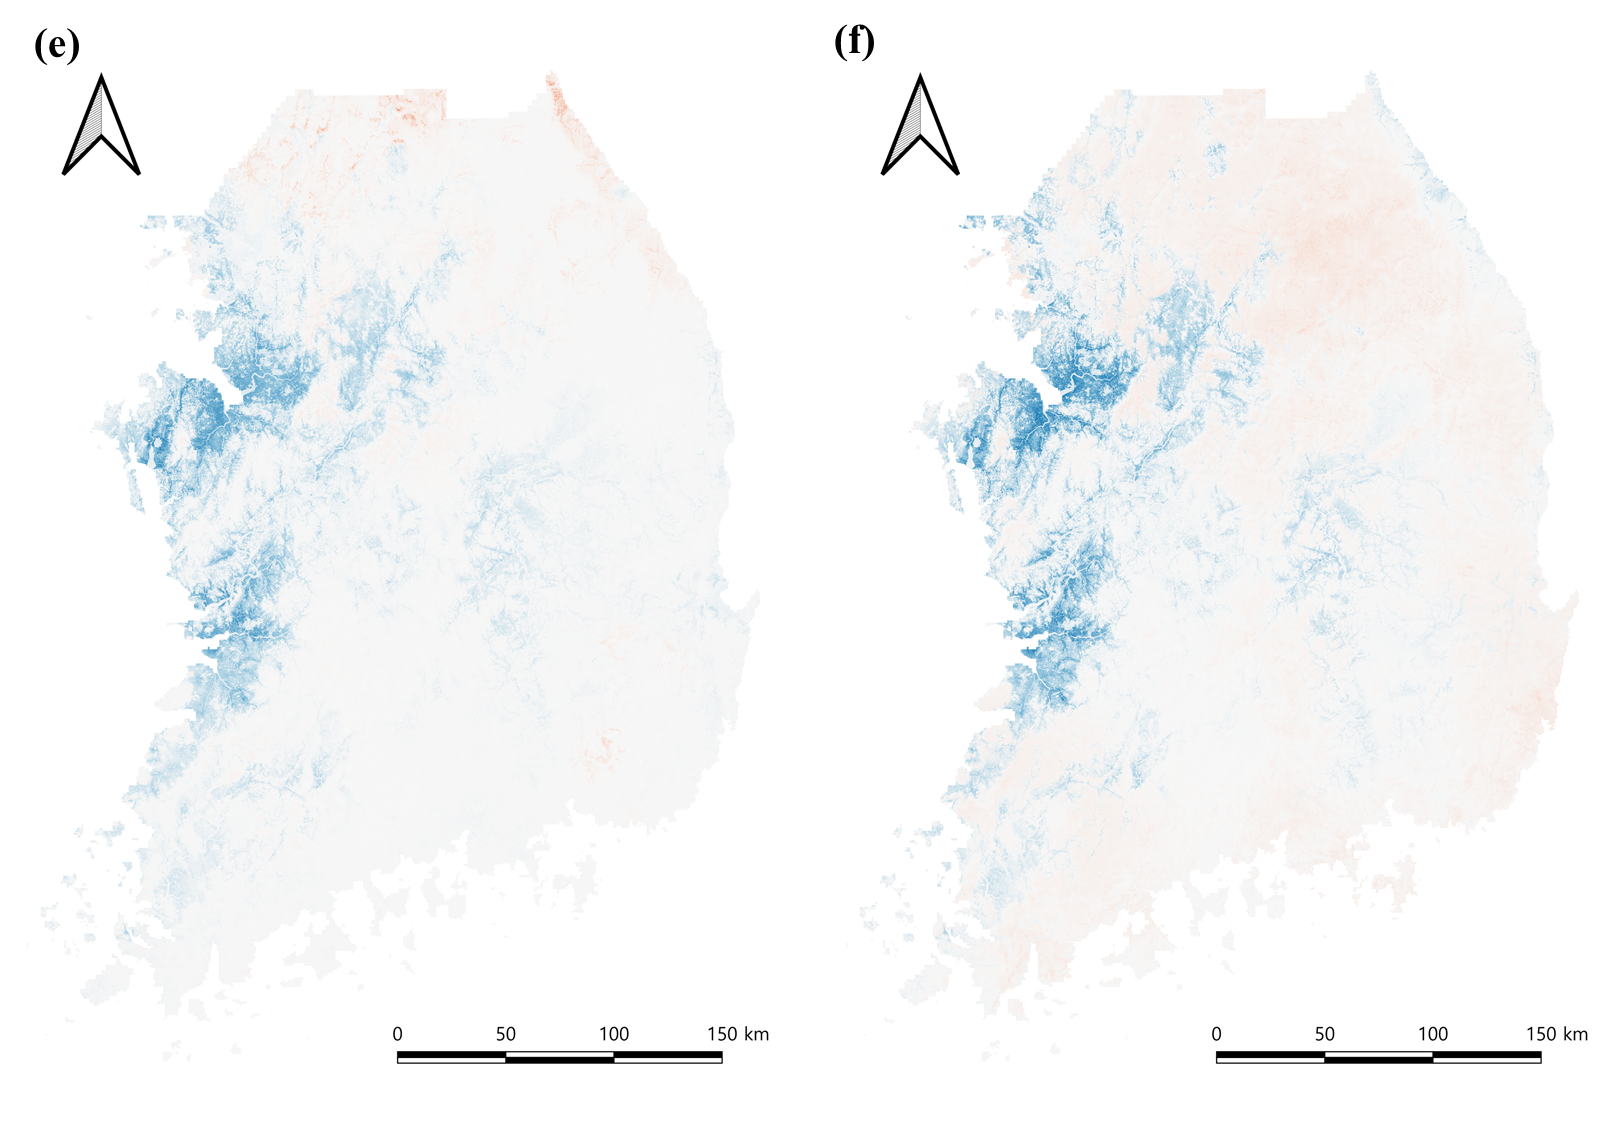 |

**Supplementary Figure 2.** Differences between the current and future potential habitats of the Suweon treefrog predicted under climate change scenarios with (a-b) SSP 1-2.6, (c-d) SSP3-7.0, (d-e) SSP5-8.5, (a, c, e) 2050s and (b, d, f) 2080s. The Redder the area, the higher the future habitat suitability; the bluer the area, the greater the current suitability.

| **No.** | **Authors,**  **year of publication** | **No. of Study Location** | **No. of presence sites** | **No. of absence sites** | **Title** |
| --- | --- | --- | --- | --- | --- |
| 1 | Borzée et al., 2017 | 2 | 0 | 2 | Impact of land reclamation and agricultural water regime on the distribution and conservation status of the endangered *Dryophytes suweonensis* |
| 2 | Borzée et al., 2013 | 7 | 5 | 2 | Morphometrics of two sympatric species of tree frogs in Korea: a morphological key for the critically endangered *Hyla suweonensis* in relation to *H. japonica* |
| 3 | Jang et al., 2011 | Geographic Variation in Advertisement Calls in a Tree Frog Species: Gene Flow and Selection Hypotheses |
| 4 | Park et al., 2013 | No reproductive character displacement in male advertisement signals of *Hyla japonica* in relation to the sympatric *H. suweonensis* |
| 5 | Koo et al., 2022 | 1 | 1 | 0 | A REPORT ON THE LARGEST POPULATION OF A CRITICALLY ENDANGERED TREEFROG, Dryophytes suweonensis, IN REPUBLIC OF KOREA |
| 6 | National Institue of Biological Resources, 2013 | 42 | 42 | 0 | Final Research Report on the Conservation Breeding and Restoration of *Dryophytes suweonensis,* an Endangered Species (Ⅰ) |
| 7 | National Institue of Biological Resources, 2013 | 102 | 24 | 78 | Final Research Report on the Conservation Breeding and Restoration of *Dryophytes suweonensis,* an Endangered Species (Ⅱ) |
| 8 | Park et al., 2021 | 1 | 1 | 0 | Defining Conservation Requirements for the Suweon Treefrog (*Dryophytes suweonensis*) Using Species Distribution Models |
| 9 | Rahman et al., 2023 | 5 | 5 | 0 | Population-level call properties of endangered *Dryophytes suweonensissensu* lato (Anura: Amphibia) in South Korea |
| 10 | Borzée et al., 2016 | 6 | 6 | 0 | Asymmetric competition over calling sites in two closely related treefrog species |
| 11 | Borzée et al., 2018 | 37 | 37 | 0 | Introduced bullfrogs are associated with increased *Batrachochytrium dendrobatidis* prevalence and reduced occurrence of Korean treefrogs |
| 12 | Borzée et al., 2018 | 17 | 14 | 3 | Variations in boldness, behavioural and physiological traits of an endangered and a common hylid species from Korea |
| 13 | Amaël and Yikweon, 2018 | 1 | 1 | 0 | INTERFERENCE COMPETITION DRIVEN BY HYDRIC STRESS IN KOREAN HYLIDS |
| 14 | Ham, 2014 | 1 | 1 | 0 | Morphology, Age Structure and Mating Call Characteristics of Japanese tree frog (*Hyla Japonica*) and Suweon tree frog (*Hyla Suweonensis*) |
| 15 | Andersen et al., 2023 | 93 | 90 | 3 | Influence of landscape and connectivity on anuran conservation: population viability analyses to designate protected areas |

**Supplementary Table 1.** Summary of references on the Suweon Treefrog since 2000

| **Administrative regions** | **Threshold values** | | | | | | | | | | |
| --- | --- | --- | --- | --- | --- | --- | --- | --- | --- | --- | --- |
| **Unsuitable** | | | **Suitable** | | | | **Highly suitable** | | | |
| **[0-0.1)** | **[0.1-0.2)** | **[0.2-0.296)** | **[0.296-0.3)** | **[0.3-0.4)** | **[0.4-0.5)** | **[0.5-0.6)** | **[0.6-0.7)** | **[0.7-0.8)** | **[0.8-0.9)** | **[0.9-1]** |
| South Korea | 73989.83 | 5528.603 | 2741.085 | 88.068 | 1766.635 | 1222.76 | 895.349 | 704.645 | 546.399 | 328.324 | 74.659 |
| Seoul | 589.978 | 7.093 | 5.633 | 0.226 | 6.853 | 4.526 | 2.13 | 1.505 | 0.385 | 0 | 0 |
| Busan | 685.283 | 28.299 | 0.008 | 0 | 0 | 0 | 0 | 0 | 0 | 0 | 0 |
| Daegu | 842.385 | 29.398 | 12.819 | 0.357 | 3.296 | 0 | 0 | 0 | 0 | 0 | 0 |
| Incheon | 293.302 | 8.487 | 13.39 | 0.73 | 20.14 | 22.199 | 16.495 | 12.454 | 3.288 | 0.004 | 0 |
| Gwangju | 437.853 | 31.948 | 26.085 | 1.52 | 6.477 | 0.013 | 0 | 0 | 0 | 0 | 0 |
| Daejeon | 492.071 | 38.179 | 10.869 | 0.157 | 2.929 | 1.893 | 0.289 | 0 | 0 | 0 | 0 |
| Ulsan | 1021.803 | 18.339 | 3.139 | 0 | 0 | 0 | 0 | 0 | 0 | 0 | 0 |
| Sejong | 355.12 | 59.095 | 28.247 | 0.627 | 10.337 | 6.269 | 6.241 | 1.904 | 0.143 | 0 | 0 |
| Gyeonggi-do | 6188.357 | 679.289 | 440.364 | 17.906 | 432.716 | 358.364 | 260.856 | 185.482 | 137.822 | 110.069 | 21.727 |
| Gangwon state | 12984.68 | 368.985 | 143.129 | 3.651 | 62.776 | 26.566 | 10.698 | 3.924 | 1.665 | 0.001 | 0 |
| Chungcheongbuk-do | 6195.064 | 531.564 | 298.983 | 9.802 | 191.735 | 111.814 | 72.676 | 33.954 | 7.131 | 0.073 | 0 |
| Chungcheongnam-do | 4432.233 | 847.781 | 519.117 | 19.395 | 436.035 | 370.379 | 312.095 | 284.382 | 259.332 | 185.977 | 52.932 |
| Jeonbuk State | 5814.752 | 573.312 | 331.497 | 11.696 | 261.602 | 226.374 | 202.79 | 180.373 | 136.633 | 32.2 | 0 |
| Jeollanam-do | 7746.29 | 706.567 | 333.896 | 9.103 | 140.168 | 35.713 | 5.81 | 0.369 | 0 | 0 | 0 |
| Gyeongsangbuk-do | 16939.19 | 1271.317 | 483.447 | 12.149 | 186.91 | 58.65 | 5.269 | 0.298 | 0 | 0 | 0 |
| Gyeonsangnam-do | 8971.47 | 328.95 | 90.462 | 0.749 | 4.661 | 0 | 0 | 0 | 0 | 0 | 0 |

**Supplementary Table 2.** Area by province according to the suitability of Suweon treefrog habitat
